# Supplementary material for: Synthesis of green fluorescent carbon quantum dots from the latex of Ficus benghalensis for the detection of tyrosine and fabrication of Schottky barrier diode
Source: Royal Society of Chemistry journal article supplement (doi:10.1039/d1nj01655e), 2021-01-01
Supplement: d1nj01655e1.pdf [file d1nj01655e1.pdf]

## Electronic Supplementary Information

### Synthesis of green fluorescent carbon quantum dots via latex of ficus benghalensis for the detection of tyrosine and fabrication of Schottky barrier diode

Pradeep Kumar Yadav<sup>a</sup>, Rishibrind Kumar Upadhyay<sup>b</sup>, Deepak Kumar<sup>a</sup>, Subhash Chandra<sup>a</sup>, Daraksha Bano<sup>a</sup>, Satyabrata Jit<sup>b</sup>, and Syed Hadi Hasan<sup>a</sup>

<sup>a</sup>Nano Material Research Laboratory, Department of Chemistry, Indian Institute of Technology (BHU), Varanasi -221005, U.P., India.

<sup>b</sup>Department of Electronics Engineering, Indian Institute of Technology (BHU), Varanasi -221005, U.P., India

| Contents                                                                                                                                                                                      | Pages     |
|-----------------------------------------------------------------------------------------------------------------------------------------------------------------------------------------------|-----------|
| 1. (Fig. <b>S1</b> ) Zeta potential of as-prepared G-CQDs.....                                                                                                                                | <b>S3</b> |
| 2. (Fig. <b>S2</b> ) Study of pH change on the fluorescence intensity of G-CQDs with corresponding photograph under UV – light ( $\lambda_{ex} = 365 \text{ nm}$ ) from pH range 2 to 12..... | <b>S3</b> |
| 3. (Fig. <b>S3</b> ) Effect of NaCl on emission spectra of G-CQDs with photograph under UV- light ( $\lambda_{ex} = 365 \text{ nm}$ ).....                                                    | <b>S4</b> |
| 4. (Fig. <b>S4</b> ) Influence of metal ions on the fluorescence of G-CQDs.....                                                                                                               | <b>S4</b> |

5. **(Table S1)** Detail about fluorescence quantum yield measurement .....**S5**
  
6. **(Table S2)** Details of fluorescence life time measurement of G-CQDs in the presence and absence of Tyrosine .....**S6.**
  
7. **(Table S3)** Tyr detection in milk sample by using G-CQDs.....**S7**

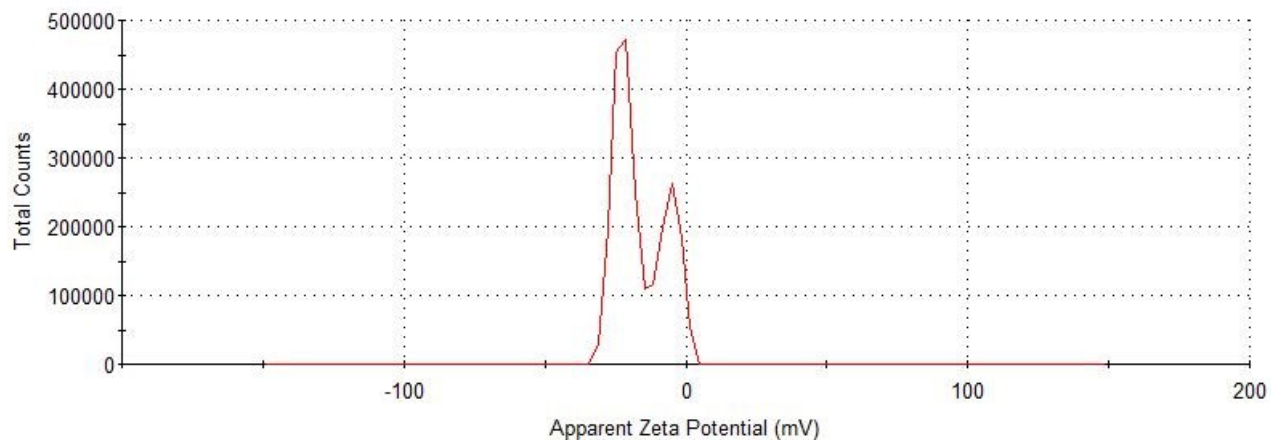

**Fig. S1.** Zeta potential of as-synthesized G-CQDs.

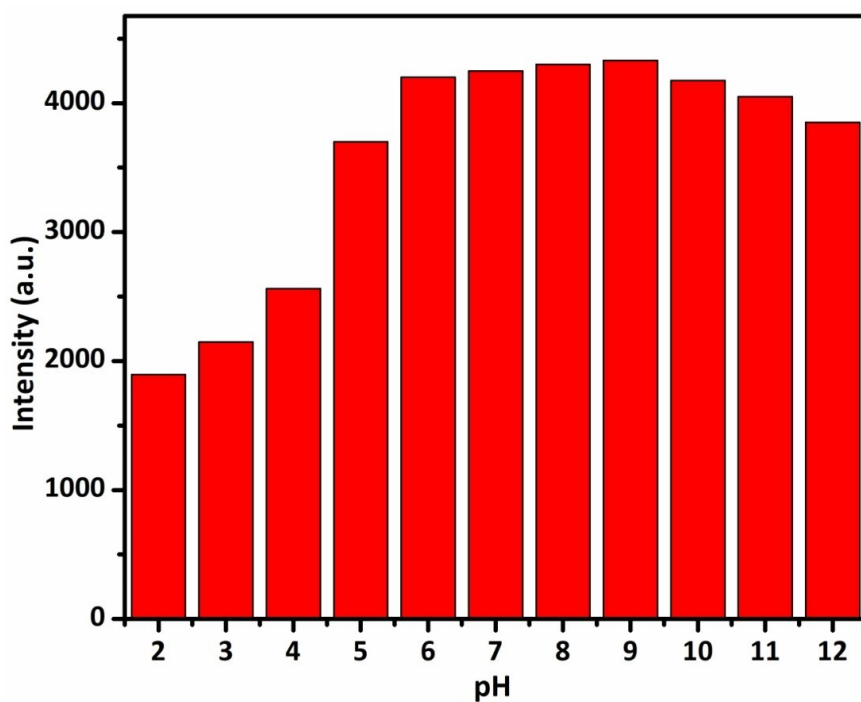

**Fig. S2.** Study of pH change on the fluorescent intensity of G-CQDs with corresponding photograph under UV – light ( $\lambda_{ex} = 365 \text{ nm}$ ) from pH range 2 to 12.

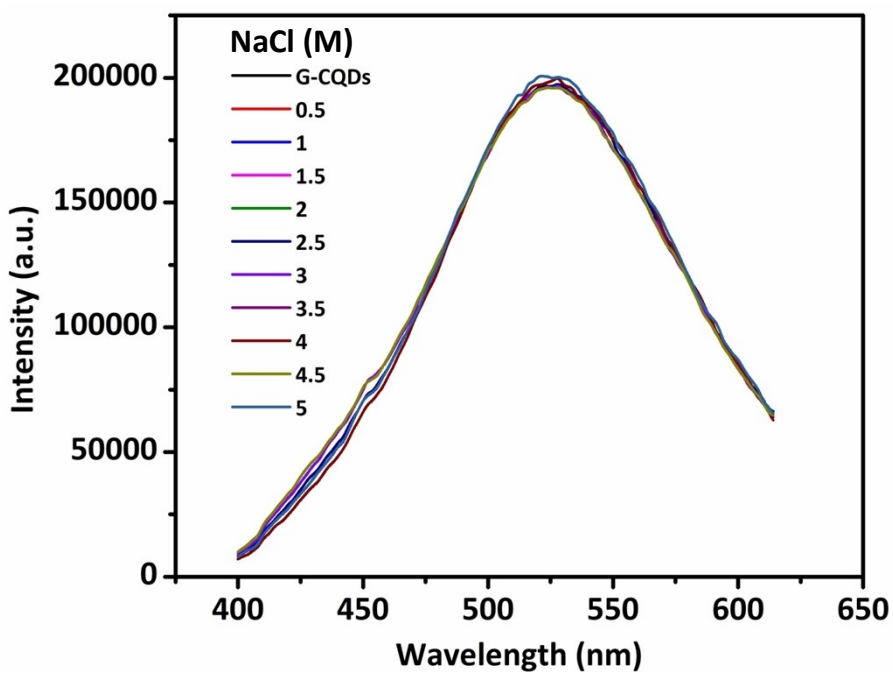

Fig. S3. Effect of ionic strength on the fluorescent intensity of G-CQDs.

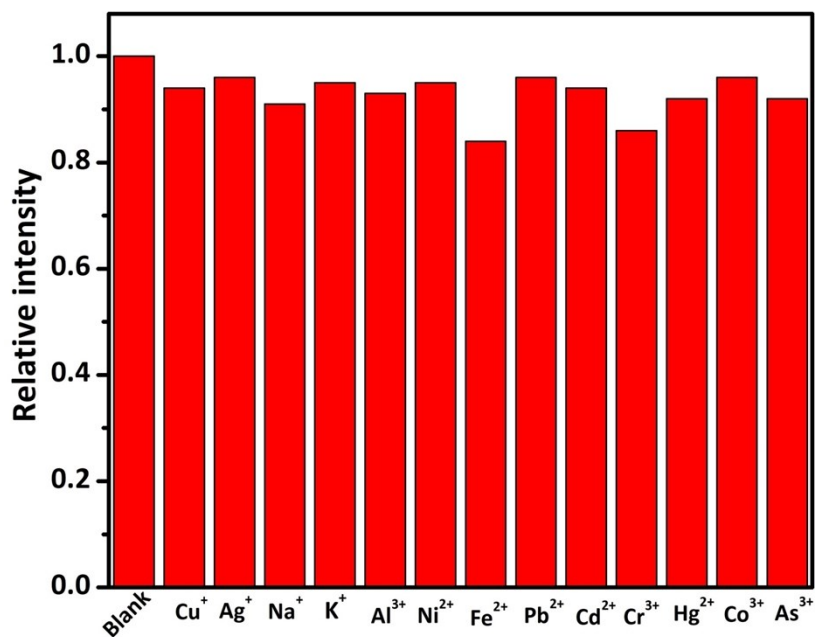

Fig. S4 Influence of metal ions on the fluorescence of G-CQDs.

**Table S1.** Calculation of fluorescence quantum yield with integrated intensity and absorbance of quinine sulfate and G-CQDs at excitation wavelength 360 nm.

| Sample                           | Integrated intensity at 360 nm | Absorbance at 360 nm | Quantum yield (%) |
|----------------------------------|--------------------------------|----------------------|-------------------|
| Quinine sulphate<br>(reference ) | 51246927                       | 0.076                | 54                |
| G-CQDs                           | 38087271                       | 0.074                | 41.2              |

Following **equation S1** was used to calculate quantum yield

$$QY = QY_{Ref} \cdot \frac{I \cdot A_{Ref} \cdot \eta^2}{A \cdot I_{Ref} \cdot \eta_{Ref}^2} \quad \mathbf{S1}$$

Where QY and QY<sub>ref</sub> are quantum yield of G-CQDs and reference respectively, I is the integrated intensity, A is the absorbance and η is the refractive index (η<sup>2</sup>/η<sup>2</sup><sub>ref</sub> =1) of the solvent.

**Table S2** Fluorescence lifetime measurement of G-CQDs in the presence and absence of Tyrosine.

| Compound     | Average life time (ns) | Chi square | Different life time (ns)                                                                                    | Corresponding Weight (%) |
|--------------|------------------------|------------|-------------------------------------------------------------------------------------------------------------|--------------------------|
| G-CQDs       | 5.34                   | 1.07       | $\tau_1 = 1.03$ ( $B_1=5421.42$ )<br>$\tau_2 = 4.06$ ( $B_2=4657.10$ )<br>$\tau_3 = 10.5$ ( $B_3=787.87$ )  | 17.06<br>57.68<br>25.26  |
| G-CQDs + Tyr | 5.18                   | 1.20       | $\tau_1 = 1.02$ ( $B_1=5323.23$ )<br>$\tau_2 = 3.89$ ( $B_2=4541.37$ )<br>$\tau_3 = 9.77$ ( $B_3=1125.83$ ) | 15.91<br>51.86<br>32.23  |

The fluorescence life time decay of G-CQDs was fitted by a tri-exponential role. Chi-square standards and corresponding residual division were reduced to judge the best fit. The adequate fit has a chi-square close to unity.

The fitting system of the fluorescence emission intensity decay  $I_{(t)}$  uses a tri-exponential representation according to the following equation-

$$I_{(t)} = B_1 \exp(-t / \tau_1) + B_2 \exp(-t / \tau_2) + B_3 \exp(-t / \tau_3)$$

Where  $\tau_1$  ,  $\tau_2$  and  $\tau_3$  represents time constants of the three radiative decays channel and  $B_1$ ,  $B_2$  ,  $B_3$  are three corresponding amplitudes.

To calculate the average life time, following equation was used -

$$\langle \tau \rangle = \frac{B_1 \tau_1^2 + B_2 \tau_2^2 + B_3 \tau_3^2}{B_1 \tau_1 + B_2 \tau_2 + B_3 \tau_3}$$

**Table S3.** Detection of Tyr in milk sample by using G-CQDs.

---

| Added ( $\mu\text{M}$ ) | Found ( $\mu\text{M}$ ) | Recovery (%) |
|-------------------------|-------------------------|--------------|
| 25                      | 22.8                    | 91.2 %       |
| 50                      | 47.3                    | 94.6 %       |
| 75                      | 68.8                    | 91.7%        |
| 100                     | 93.4                    | 93.4%        |

---

RSD =  $92.72 \pm 1.69\%$
